# Supplementary material for: How to survive in the world’s third poplar: Insights from the genome of the highest altitude woody plant, Hippophae tibetana (Elaeagnaceae)
Source: PubMed Central journal article supplement (PMC9797102; doi:10.3389/fpls.2022.1051587), 2022-12-14
Supplement: DataSheet_1.pdf [file DataSheet_1.pdf]

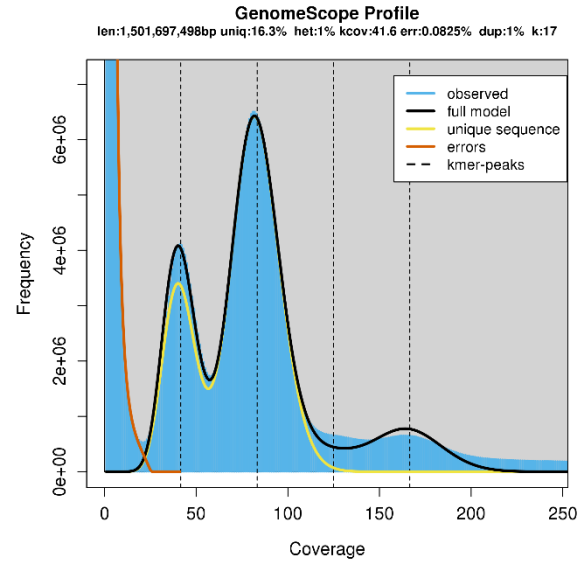

Figure S1. **Genome size estimation by GenomeScope.** GenomeScope profile of the *H. tibetana* genome inferred using a k-mer size of 17. Heterozygosity was estimated to be 1%. The genome haploid length and the proportion of repetitive sequences were estimated as 1.43 Gb and 83.7%, respectively.

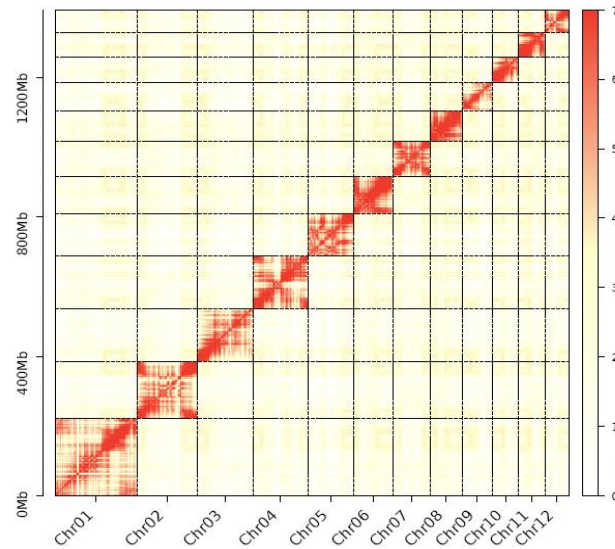

**Figure S2. Interaction frequency distribution of Hi-C links among chromosomes.** Genome-wide all-by-all Hi-C interaction matrix for sea-buckthorn chromosomes assembly using 12 clusters.

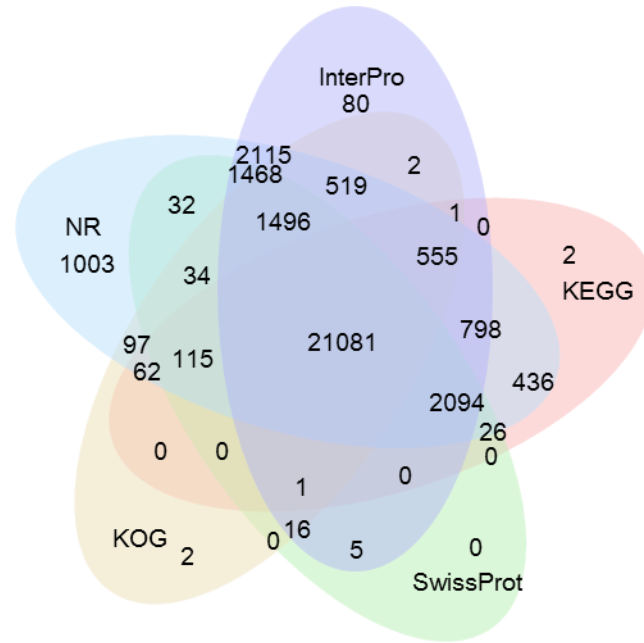

**Figure S3. Functional annotation Venn diagram of *H. tibetana* protein coding genes using multiple protein related databases.** Eukaryotic orthologous group (KOG), non-redundant protein database (NR), Kyoto encyclopedia of genes and genomes (KEGG), Swiss-Prot and InterPro.

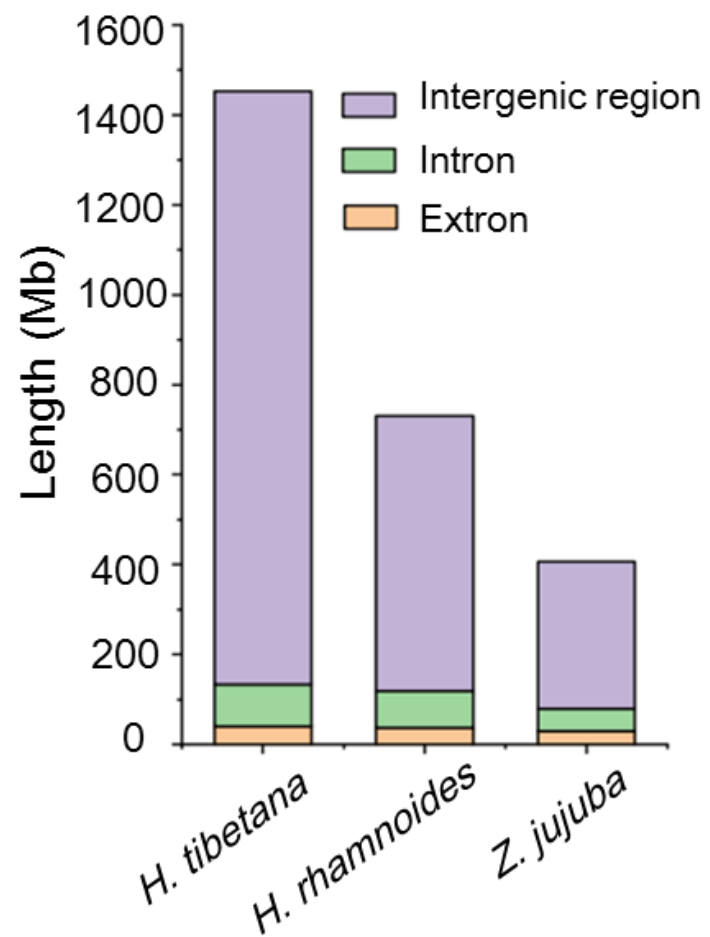

**Figure S4. The proportions of exon, intron and intergenic region in *H. tibetana* genome.**

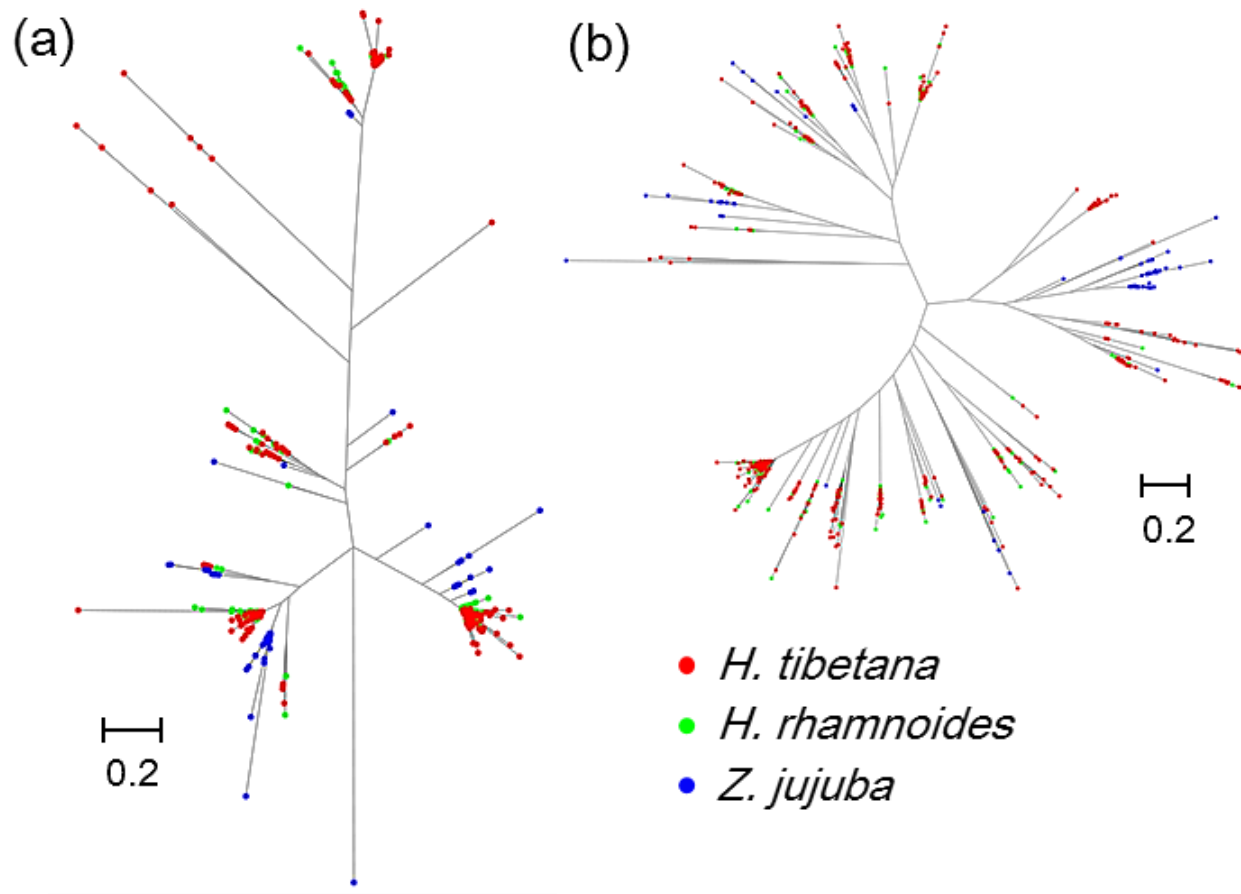

**Figure S5. Phylogeny reconstruction of (a) Ty3/Gypsy type and (b) Ty1/Copia type LTR retrotransposons.**

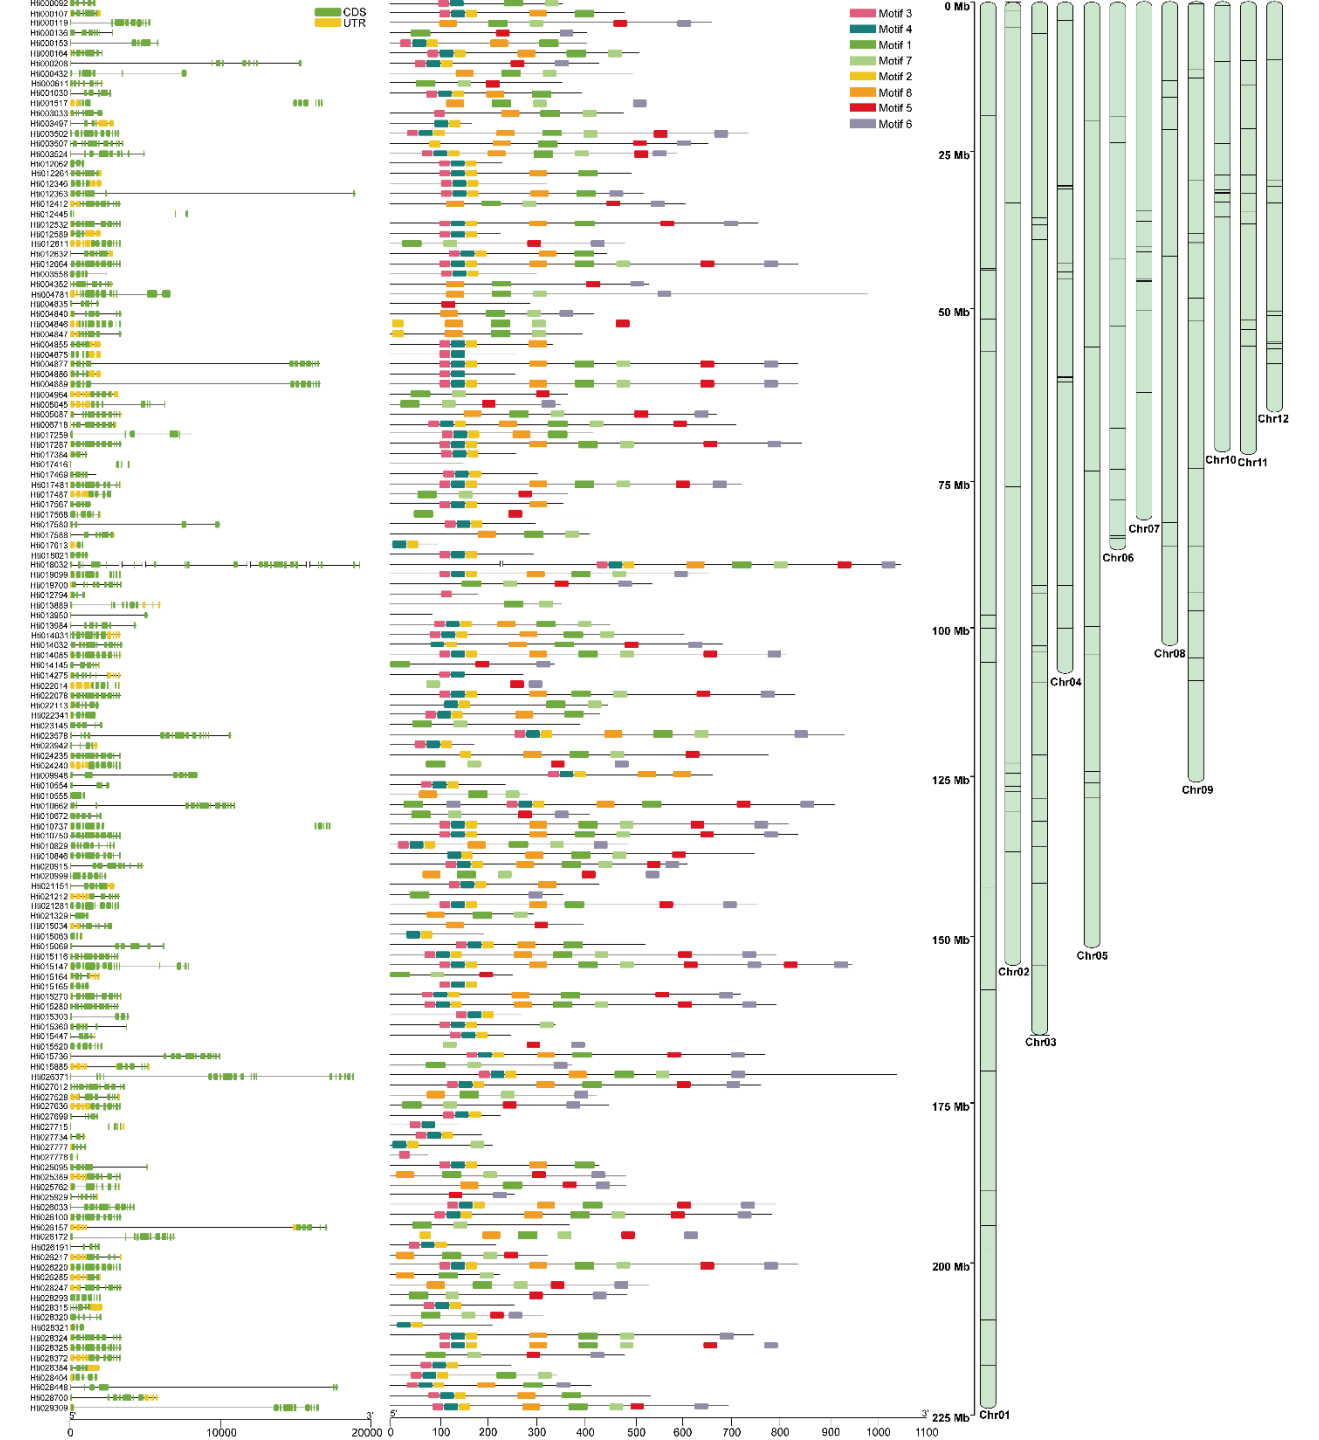

**Figure S6. The distribution and structural characteristics of OG42 DNA transposons.**

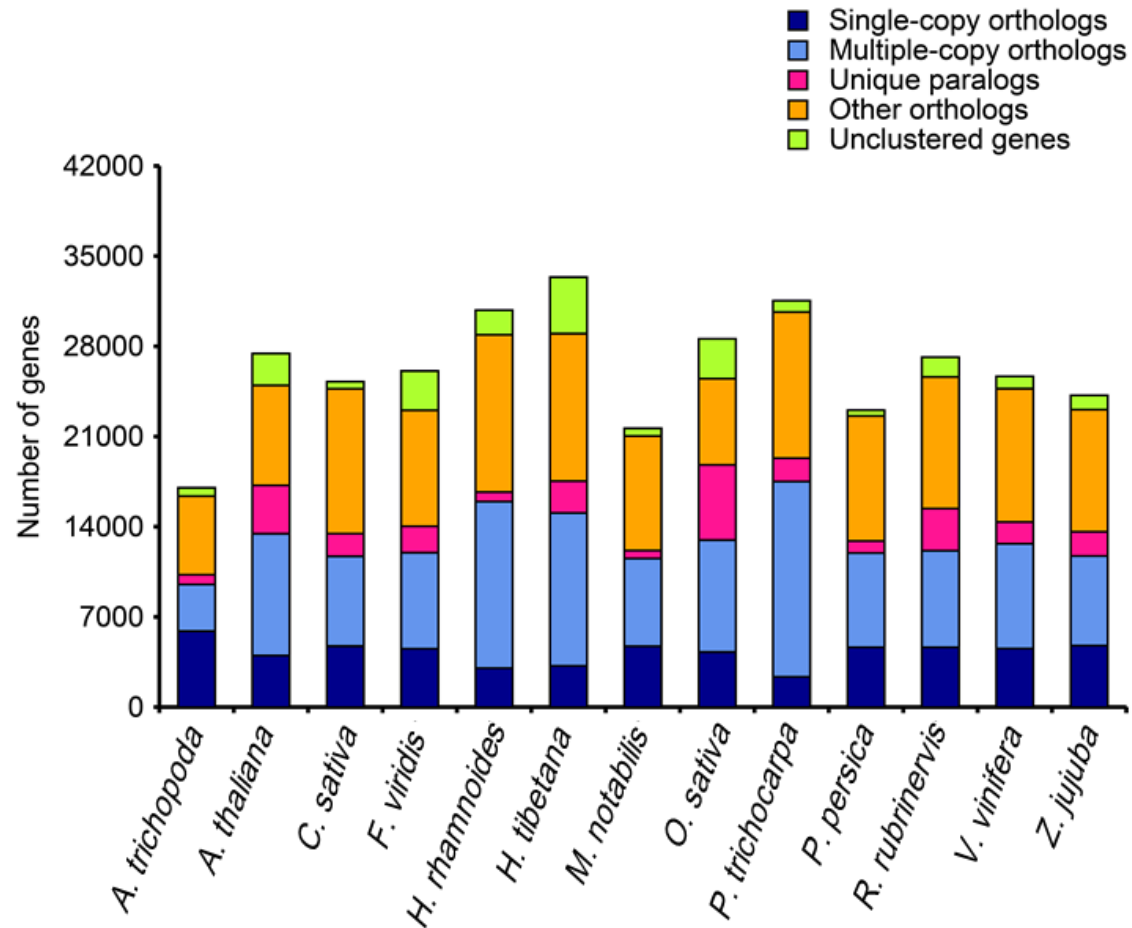

**Figure S7. Comparison of gene families among *H. tibetana* and other 12 species.**

Clusters of orthologous and paralogous gene families in *H. tibetana* and 12 more fully sequenced plant genomes. Only the longest isoform for each gene was used. Gene families were identified using the OrthoMCL package with the default parameters.

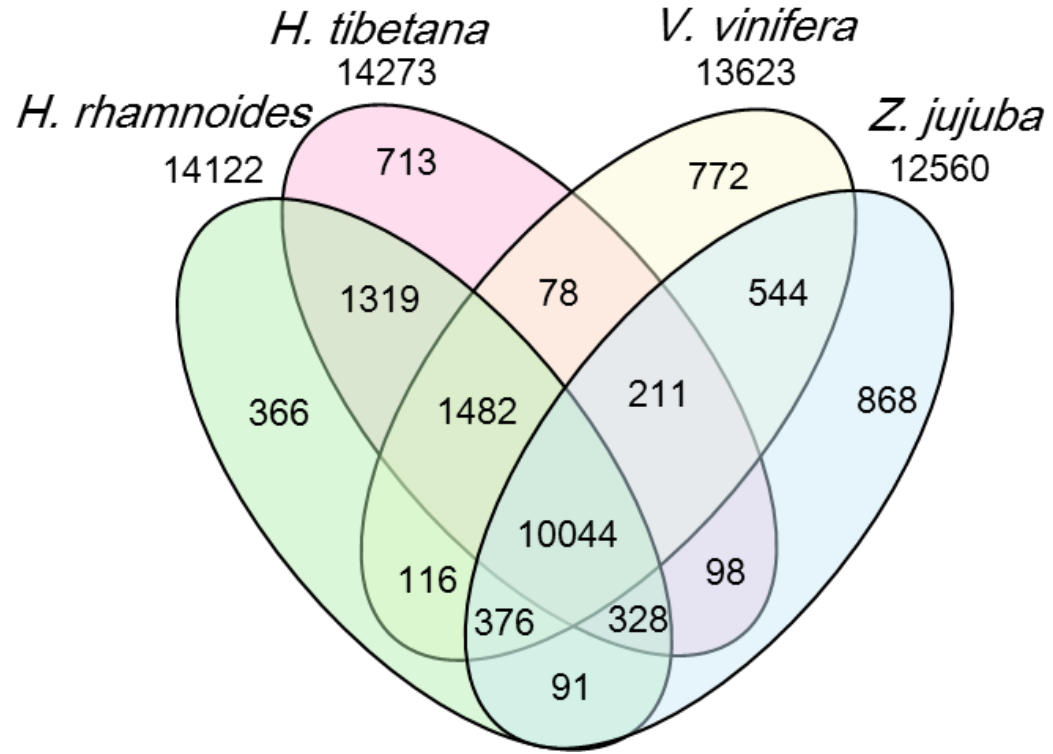

**Figure S8.** Venn diagram of shared and specific gene family numbers among *Hippophae tibetana* and three other species (*Ziziphus jujuba*, *Vitis vinifera* and *Hippophae rhamnoides*).



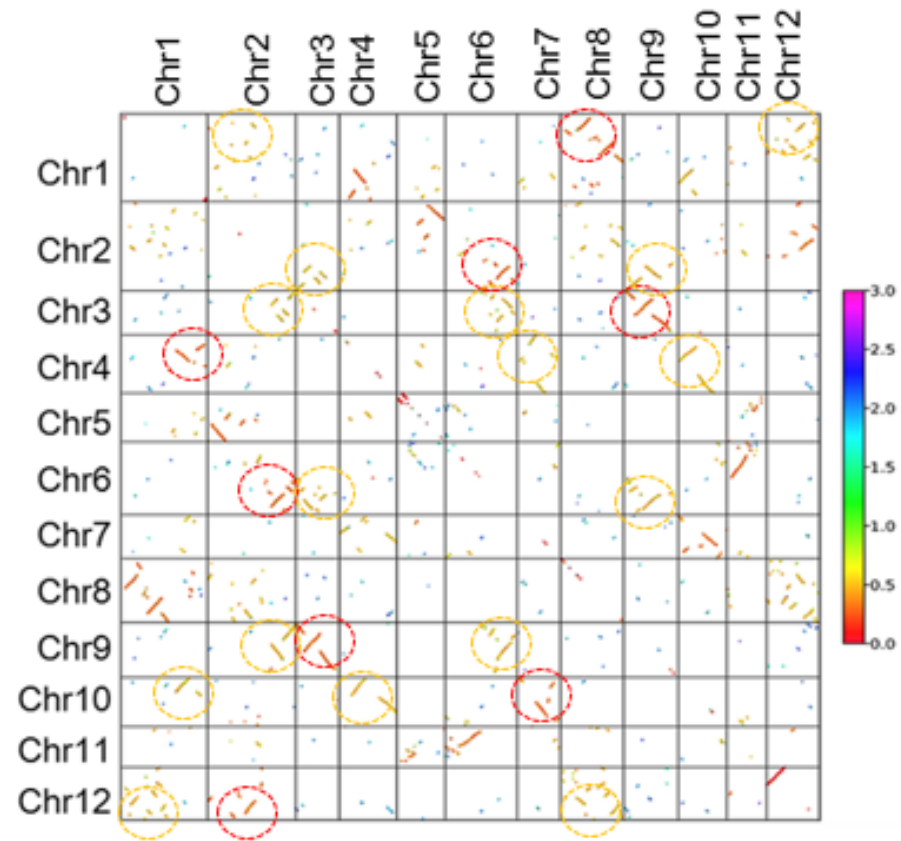

**Figure S9. Dot plots of paralogs identified across Contigs in the *H. tibetana* genome. Dotted circle highlight examples of significant duplicate events.**

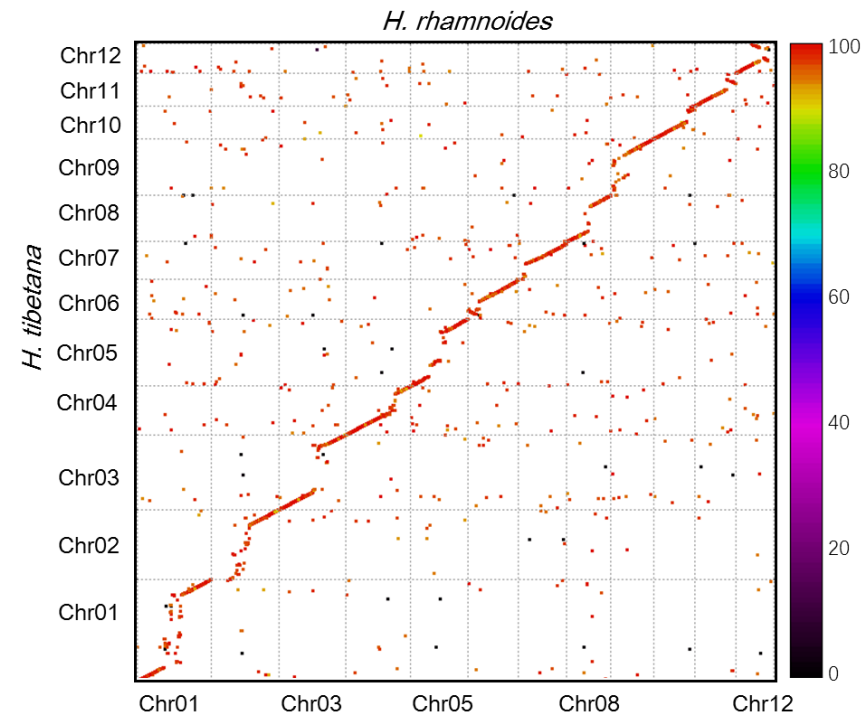

**Figure S10. Genomic collinearity analysis of *H. tibetana* and *H. rhamnoides*.**

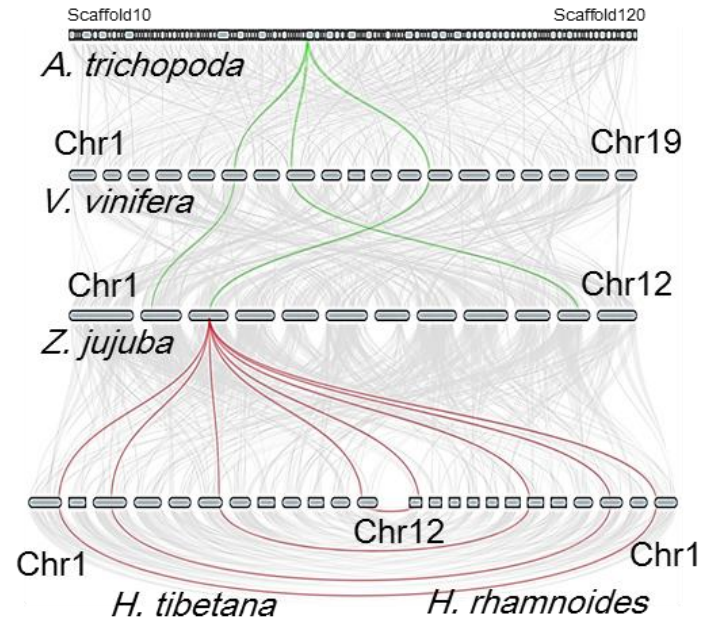

**Figure S11. Syntenic gene blocks among *A. trichopoda*, *Z. jujuba*, *V. vinifera*, *H. rhamnoides* and *H. tibetana*.** Examples of microsynteny connected by colored lines highlight the occurrence of two genome-wide duplications in seabuckthorn.

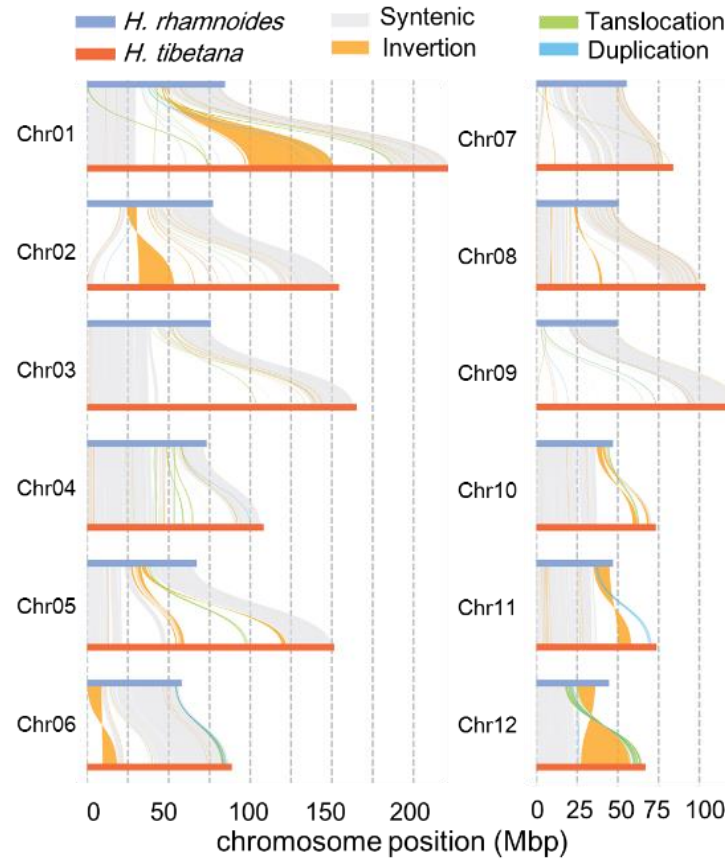

**Figure S12. Syntenic blocks between the genomes of *H. rhamnoides* and *H. tibetana*.** The syntenic alignment suggested high similarity between the karyotypes of two *Hippophae* species. Syntenic analysis was performed using McScan, and genes were visualized in blocks of 10.

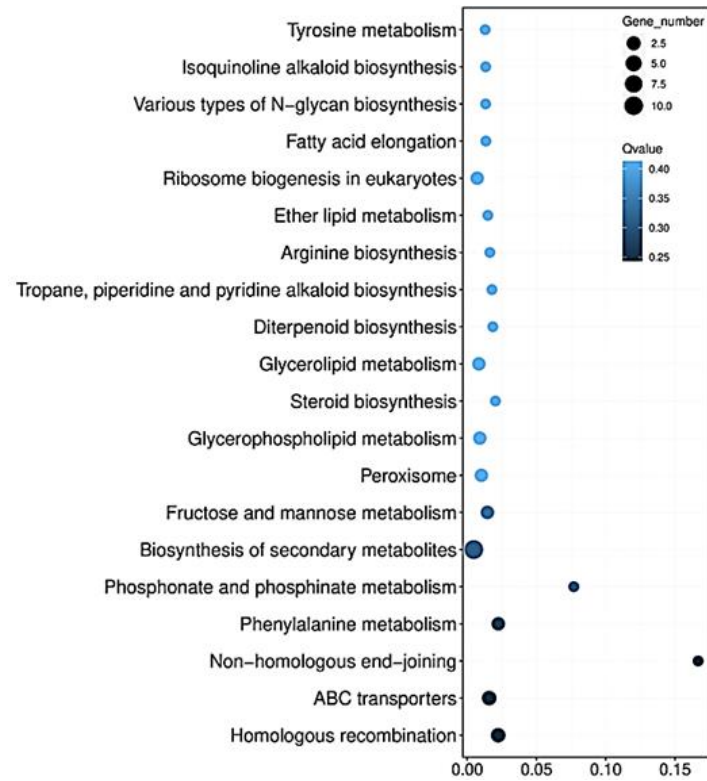

**Figure S13. Functional enrichment of the positive selection genes.** The gene number and the significance of each GO term were indicated by size and color of dot.

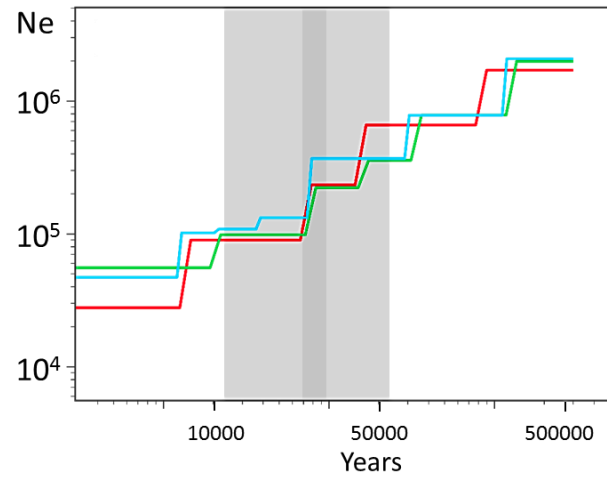

**Figure S14. Demographic history of *H. tibetana* inferred with SMC++.**
